# Supplementary material
Source: publisher figshare collection journal article supplement (https://acs.figshare.com/ndownloader/files/4053046)
Supplement: Supplementary file 1 [file 4053046]

 
data_3 
 
_audit_creation_method            SHELXL-97 
_chemical_name_systematic 
; 
 ? 
; 
_chemical_name_common             ? 
_chemical_melting_point           ? 
_chemical_formula_moiety          ? 
_chemical_formula_sum 
 'C26 H26 F12 Fe P2 Pd Se4' 
_chemical_formula_weight          1106.50 
 
loop_ 
 _atom_type_symbol 
 _atom_type_description 
 _atom_type_scat_dispersion_real 
 _atom_type_scat_dispersion_imag 
 _atom_type_scat_source 
 'C'  'C'   0.0033   0.0016 
 'International Tables Vol C Tables 4.2.6.8 and 6.1.1.4' 
 'H'  'H'   0.0000   0.0000 
 'International Tables Vol C Tables 4.2.6.8 and 6.1.1.4' 
 'N'  'N'   0.0061   0.0033 
 'International Tables Vol C Tables 4.2.6.8 and 6.1.1.4' 
 'F'  'F'   0.0171   0.0103 
 'International Tables Vol C Tables 4.2.6.8 and 6.1.1.4' 
 'P'  'P'   0.1023   0.0942 
 'International Tables Vol C Tables 4.2.6.8 and 6.1.1.4' 
 'Fe'  'Fe'   0.3463   0.8444 
 'International Tables Vol C Tables 4.2.6.8 and 6.1.1.4' 
 'Se'  'Se'  -0.0929   2.2259 
 'International Tables Vol C Tables 4.2.6.8 and 6.1.1.4' 
 'Pd'  'Pd'  -0.9988   1.0072 
 'International Tables Vol C Tables 4.2.6.8 and 6.1.1.4' 
 
_symmetry_cell_setting            'Triclinic' 
_symmetry_space_group_name_H-M    'P-1' 
_symmetry_space_group_name_Hall  '-P 1' 
 
loop_ 
 _symmetry_equiv_pos_as_xyz 
 'x, y, z' 
 '-x, -y, -z' 
 
_cell_length_a                    10.6758(19) 
_cell_length_b                    11.868(2) 
_cell_length_c                    13.387(2) 
_cell_angle_alpha                 75.271(3) 
_cell_angle_beta                  78.638(3) 
_cell_angle_gamma                 83.311(3) 
_cell_volume                      1604.4(5) 
_cell_formula_units_Z             2 
_cell_measurement_temperature     293(2) 
_cell_measurement_reflns_used     3880
_cell_measurement_theta_min       2.569 
_cell_measurement_theta_max       28.058 
 
_exptl_crystal_description        'blocky'  
_exptl_crystal_colour             'black brown' 
_exptl_crystal_size_max           0.2 
_exptl_crystal_size_mid           0.1 
_exptl_crystal_size_min           0.1 
_exptl_crystal_density_meas       ? 
_exptl_crystal_density_diffrn     2.290 
_exptl_crystal_density_method     'not measured' 
_exptl_crystal_F_000              1056 
_exptl_absorpt_coefficient_mu     5.740 
_exptl_absorpt_correction_type    'multi-scan'  
_exptl_absorpt_correction_T_min   0.743 
_exptl_absorpt_correction_T_max   0.820 
_exptl_absorpt_process_details    'SADABS, Bruker(2000)' 
 
_exptl_special_details 
; 
 ? 
; 
 
_diffrn_ambient_temperature       293(2) 
_diffrn_radiation_wavelength      0.71073 
_diffrn_radiation_type            MoK\a 
_diffrn_radiation_source          'fine-focus sealed tube' 
_diffrn_radiation_monochromator   graphite 
_diffrn_measurement_device_type   'Bruker Smart Aepex CCD area detector' 
_diffrn_measurement_method        'phi and omega scans'   
_diffrn_detector_area_resol_mean  ? 
_diffrn_standards_number          ? 
_diffrn_standards_interval_count  ? 
_diffrn_standards_interval_time   ? 
_diffrn_standards_decay_%         ? 
_diffrn_reflns_number             7926 
_diffrn_reflns_av_R_equivalents   0.0234 
_diffrn_reflns_av_sigmaI/netI     0.0483 
_diffrn_reflns_limit_h_min        -12 
_diffrn_reflns_limit_h_max        12 
_diffrn_reflns_limit_k_min        -14 
_diffrn_reflns_limit_k_max        13 
_diffrn_reflns_limit_l_min        -12 
_diffrn_reflns_limit_l_max        15 
_diffrn_reflns_theta_min          1.95 
_diffrn_reflns_theta_max          25.00 
_reflns_number_total              5549 
_reflns_number_gt                 4615 
_reflns_threshold_expression      >2sigma(I) 
 
_computing_data_collection        'SMART (Bruker, 2000)' 
_computing_cell_refinement        'SMART' 
_computing_data_reduction         'SAINT (Bruker, 2000)' 
_computing_structure_solution     'SHELXTL (Bruker, 2000)' 
_computing_structure_refinement   'SHELXTL' 
_computing_molecular_graphics     'SHELXTL' 
_computing_publication_material   'SHELXTL' 
 
_refine_special_details 
; 
 Refinement of F^2^ against ALL reflections.  The weighted R-factor wR and 
 goodness of fit S are based on F^2^, conventional R-factors R are based 
 on F, with F set to zero for negative F^2^. The threshold expression of 
 F^2^ > 2sigma(F^2^) is used only for calculating R-factors(gt) etc. and is 
 not relevant to the choice of reflections for refinement.  R-factors based 
 on F^2^ are statistically about twice as large as those based on F, and R- 
 factors based on ALL data will be even larger. 
; 
 
_refine_ls_structure_factor_coef  Fsqd  
_refine_ls_matrix_type            full 
_refine_ls_weighting_scheme       calc  
_refine_ls_weighting_details 
 'calc w=1/[\s^2^(Fo^2^)+(0.1395P)^2^+0.0000P] where P=(Fo^2^+2Fc^2^)/3' 
_atom_sites_solution_primary      direct 
_atom_sites_solution_secondary    difmap 
_atom_sites_solution_hydrogens    geom 
_refine_ls_hydrogen_treatment     mixed 
_refine_ls_extinction_method      none 
_refine_ls_extinction_coef        ? 
_refine_ls_number_reflns          5549 
_refine_ls_number_parameters      415 
_refine_ls_number_restraints      0 
_refine_ls_R_factor_all           0.0647 
_refine_ls_R_factor_gt            0.0552 
_refine_ls_wR_factor_ref          0.1743 
_refine_ls_wR_factor_gt           0.1664 
_refine_ls_goodness_of_fit_ref    1.003 
_refine_ls_restrained_S_all       1.003 
_refine_ls_shift/su_max           0.000 
_refine_ls_shift/su_mean          0.000 
 
loop_ 
 _atom_site_label 
 _atom_site_type_symbol 
 _atom_site_fract_x 
 _atom_site_fract_y 
 _atom_site_fract_z 
 _atom_site_U_iso_or_equiv 
 _atom_site_adp_type 
 _atom_site_occupancy 
 _atom_site_symmetry_multiplicity 
 _atom_site_calc_flag 
 _atom_site_refinement_flags 
 _atom_site_disorder_assembly 
 _atom_site_disorder_group 
Pd Pd 0.05630(4) 0.71128(3) 0.23472(3) 0.03262(19) Uani 1 1 d . . . 
Se2 Se 0.22390(7) 0.56026(5) 0.28438(5) 0.0420(2) Uani 1 1 d . . . 
Se4 Se -0.09926(6) 0.86471(5) 0.17389(5) 0.0371(2) Uani 1 1 d . . . 
Se1 Se -0.03531(6) 0.66262(5) 0.42056(5) 0.0393(2) Uani 1 1 d . . . 
Se3 Se 0.12893(7) 0.76686(6) 0.04783(5) 0.0413(2) Uani 1 1 d . . . 
Fe Fe 0.25361(9) 0.74501(8) 0.44043(7) 0.0425(3) Uani 1 1 d . . . 
P1 P 0.4568(2) 0.17038(17) 0.28726(15) 0.0523(5) Uani 1 1 d . . . 
P2 P 0.7461(3) 0.54929(19) 0.1945(2) 0.0693(6) Uani 1 1 d . . . 
F1 F 0.4431(6) 0.2506(5) 0.1763(4) 0.0906(17) Uani 1 1 d . . . 
F2 F 0.3098(6) 0.1641(7) 0.3196(6) 0.117(2) Uani 1 1 d . . . 
F3 F 0.4523(6) 0.2788(5) 0.3337(5) 0.0995(19) Uani 1 1 d . . . 
F4 F 0.4703(8) 0.0893(7) 0.3967(4) 0.131(3) Uani 1 1 d . . . 
F5 F 0.6073(5) 0.1703(6) 0.2547(5) 0.0942(18) Uani 1 1 d . . . 
F6 F 0.4622(7) 0.0621(5) 0.2374(5) 0.109(2) Uani 1 1 d . . . 
F7 F 0.6764(8) 0.5467(7) 0.1049(6) 0.134(3) Uani 1 1 d . . . 
F8 F 0.6729(12) 0.6717(6) 0.1974(7) 0.177(5) Uani 1 1 d . . . 
F9 F 0.8511(9) 0.6173(9) 0.1138(7) 0.173(4) Uani 1 1 d . . . 
F10 F 0.8183(9) 0.5538(8) 0.2844(6) 0.159(4) Uani 1 1 d . . . 
F11 F 0.8115(8) 0.4269(6) 0.1906(7) 0.139(3) Uani 1 1 d . . . 
F12 F 0.6374(9) 0.4902(8) 0.2786(7) 0.154(3) Uani 1 1 d . . . 
C24 C -0.2443(6) 0.8861(6) 0.2827(5) 0.0443(16) Uani 1 1 d . . . 
H24A H -0.2809 0.9655 0.2619 0.053 Uiso 1 1 calc R . . 
H24B H -0.3083 0.8347 0.2821 0.053 Uiso 1 1 calc R . . 
C25 C -0.2256(6) 0.8663(6) 0.3950(5) 0.0453(16) Uani 1 1 d . . . 
H25A H -0.1516 0.9060 0.3960 0.054 Uiso 1 1 calc R . . 
H25B H -0.2997 0.9013 0.4339 0.054 Uiso 1 1 calc R . . 
C26 C -0.2068(7) 0.7402(7) 0.4496(6) 0.0529(18) Uani 1 1 d . . . 
H26A H -0.2673 0.6974 0.4311 0.064 Uiso 1 1 calc R . . 
H26B H -0.2289 0.7338 0.5245 0.064 Uiso 1 1 calc R . . 
C13 C 0.2812(8) 0.6693(6) 0.0027(6) 0.0535(18) Uani 1 1 d . . . 
H13A H 0.2525 0.5972 -0.0035 0.064 Uiso 1 1 calc R . . 
H13B H 0.3210 0.7095 -0.0669 0.064 Uiso 1 1 calc R . . 
C11 C 0.3510(8) 0.5326(6) 0.1630(6) 0.0552(19) Uani 1 1 d . . . 
H11A H 0.4304 0.5009 0.1875 0.066 Uiso 1 1 calc R . . 
H11B H 0.3210 0.4732 0.1371 0.066 Uiso 1 1 calc R . . 
C12 C 0.3811(8) 0.6386(7) 0.0700(6) 0.063(2) Uani 1 1 d . . . 
H12A H 0.3897 0.7054 0.0969 0.076 Uiso 1 1 calc R . . 
H12B H 0.4625 0.6217 0.0276 0.076 Uiso 1 1 calc R . . 
C1 C 0.0620(6) 0.7517(6) 0.4736(5) 0.0426(15) Uani 1 1 d . . . 
C2 C 0.1121(7) 0.7105(8) 0.5667(6) 0.0557(19) Uani 1 1 d . . . 
H2 H 0.0988 0.6346 0.6161 0.067 Uiso 1 1 calc R . . 
C3 C 0.1830(8) 0.7954(10) 0.5762(7) 0.077(3) Uani 1 1 d . . . 
H3 H 0.2304 0.7894 0.6332 0.092 Uiso 1 1 calc R . . 
C4 C 0.1784(8) 0.8949(8) 0.4867(8) 0.069(2) Uani 1 1 d . . . 
H4 H 0.2214 0.9673 0.4729 0.083 Uiso 1 1 calc R . . 
C5 C 0.1053(7) 0.8664(6) 0.4232(6) 0.0494(17) Uani 1 1 d . . . 
H5 H 0.0852 0.9158 0.3568 0.059 Uiso 1 1 calc R . . 
C6 C 0.3240(6) 0.6446(6) 0.3380(6) 0.0439(15) Uani 1 1 d . . . 
C7 C 0.3710(7) 0.6000(7) 0.4341(7) 0.0576(19) Uani 1 1 d . . . 
H7 H 0.3588 0.5223 0.4808 0.069 Uiso 1 1 calc R . . 
C8 C 0.4385(7) 0.6859(9) 0.4492(8) 0.072(3) Uani 1 1 d . . . 
H8 H 0.4808 0.6795 0.5093 0.086 Uiso 1 1 calc R . . 
C9 C 0.4333(7) 0.7838(8) 0.3658(7) 0.063(2) Uani 1 1 d . . . 
H9 H 0.4713 0.8575 0.3583 0.075 Uiso 1 1 calc R . . 
C10 C 0.3627(7) 0.7612(6) 0.2956(6) 0.0520(18) Uani 1 1 d . . . 
H10 H 0.3445 0.8144 0.2302 0.062 Uiso 1 1 calc R . . 
C21 C -0.0474(7) 1.0809(6) 0.2056(5) 0.0469(16) Uani 1 1 d . . . 
H21 H -0.1284 1.0746 0.2471 0.056 Uiso 1 1 calc R . . 
C20 C 0.0166(9) 1.1812(6) 0.1923(6) 0.061(2) Uani 1 1 d . . . 
H20 H -0.0206 1.2409 0.2243 0.074 Uiso 1 1 calc R . . 
C19 C 0.1343(8) 1.1894(6) 0.1316(6) 0.0544(18) Uani 1 1 d . . . 
H19 H 0.1786 1.2550 0.1238 0.065 Uiso 1 1 calc R . . 
C18 C 0.1910(7) 1.1029(6) 0.0806(5) 0.0430(15) Uani 1 1 d . . . 
C17 C 0.3110(7) 1.1203(6) 0.0114(6) 0.0502(17) Uani 1 1 d . . . 
H17 H 0.3508 1.1886 0.0031 0.060 Uiso 1 1 calc R . . 
C16 C 0.3672(6) 1.0423(7) -0.0411(6) 0.0521(18) Uani 1 1 d . . . 
H16 H 0.4432 1.0579 -0.0883 0.063 Uiso 1 1 calc R . . 
C15 C 0.3129(6) 0.9367(6) -0.0259(5) 0.0459(16) Uani 1 1 d . . . 
H15 H 0.3549 0.8807 -0.0606 0.055 Uiso 1 1 calc R . . 
C14 C 0.1961(6) 0.9144(5) 0.0408(5) 0.0383(14) Uani 1 1 d . . . 
C23 C 0.1297(6) 0.9976(5) 0.0950(5) 0.0368(14) Uani 1 1 d . . . 
C22 C 0.0047(6) 0.9917(5) 0.1598(5) 0.0370(14) Uani 1 1 d . . . 
 
loop_ 
 _atom_site_aniso_label 
 _atom_site_aniso_U_11 
 _atom_site_aniso_U_22 
 _atom_site_aniso_U_33 
 _atom_site_aniso_U_23 
 _atom_site_aniso_U_13 
 _atom_site_aniso_U_12 
Pd 0.0407(3) 0.0259(3) 0.0296(3) -0.0042(2) -0.0078(2) 0.0020(2) 
Se2 0.0531(4) 0.0273(4) 0.0430(4) -0.0051(3) -0.0120(3) 0.0070(3) 
Se4 0.0388(4) 0.0351(4) 0.0348(4) -0.0036(3) -0.0100(3) 0.0042(3) 
Se1 0.0445(4) 0.0341(4) 0.0339(4) 0.0009(3) -0.0049(3) -0.0036(3) 
Se3 0.0548(4) 0.0384(4) 0.0295(4) -0.0082(3) -0.0081(3) 0.0032(3) 
Fe 0.0430(6) 0.0486(6) 0.0367(5) -0.0116(4) -0.0082(4) -0.0012(4) 
P1 0.0611(12) 0.0518(11) 0.0389(10) -0.0104(8) -0.0011(9) 0.0023(9) 
P2 0.1013(19) 0.0471(12) 0.0644(14) -0.0120(10) -0.0218(13) -0.0149(12) 
F1 0.112(4) 0.088(4) 0.060(3) 0.005(3) -0.023(3) 0.008(3) 
F2 0.062(3) 0.180(7) 0.111(5) -0.056(5) 0.012(3) -0.019(4) 
F3 0.117(5) 0.096(4) 0.103(4) -0.057(4) -0.018(4) -0.005(4) 
F4 0.169(7) 0.146(6) 0.048(3) 0.025(4) -0.016(4) -0.001(5) 
F5 0.064(3) 0.135(5) 0.075(4) -0.020(3) -0.006(3) 0.009(3) 
F6 0.162(6) 0.069(4) 0.100(4) -0.040(3) -0.002(4) -0.017(4) 
F7 0.168(7) 0.130(6) 0.136(6) -0.062(5) -0.092(6) 0.039(5) 
F8 0.338(14) 0.065(4) 0.117(6) -0.035(4) -0.027(8) 0.039(6) 
F9 0.173(8) 0.198(10) 0.118(6) 0.031(7) -0.005(6) -0.084(8) 
F10 0.228(10) 0.163(7) 0.117(6) -0.008(5) -0.091(7) -0.088(7) 
F11 0.169(7) 0.090(5) 0.176(8) -0.047(5) -0.084(6) 0.046(5) 
F12 0.147(7) 0.155(8) 0.145(7) -0.021(6) 0.022(6) -0.070(6) 
C24 0.032(3) 0.045(4) 0.049(4) -0.010(3) 0.003(3) 0.003(3) 
C25 0.038(4) 0.049(4) 0.046(4) -0.010(3) -0.004(3) -0.003(3) 
C26 0.041(4) 0.066(5) 0.043(4) -0.001(4) 0.005(3) -0.016(3) 
C13 0.072(5) 0.046(4) 0.037(4) -0.012(3) 0.001(4) 0.009(4) 
C11 0.066(5) 0.043(4) 0.053(4) -0.022(3) -0.006(4) 0.025(3) 
C12 0.079(6) 0.053(4) 0.048(4) -0.020(4) 0.003(4) 0.024(4) 
C1 0.049(4) 0.046(4) 0.032(3) -0.013(3) -0.002(3) 0.002(3) 
C2 0.057(5) 0.077(5) 0.035(4) -0.017(4) -0.011(3) -0.002(4) 
C3 0.058(5) 0.136(9) 0.052(5) -0.054(6) -0.010(4) 0.001(5) 
C4 0.060(5) 0.079(6) 0.084(7) -0.051(5) -0.005(5) -0.009(4) 
C5 0.054(4) 0.041(4) 0.059(4) -0.021(3) -0.011(4) 0.001(3) 
C6 0.042(4) 0.046(4) 0.044(4) -0.019(3) -0.006(3) 0.011(3) 
C7 0.049(4) 0.065(5) 0.058(5) -0.012(4) -0.020(4) 0.007(4) 
C8 0.041(4) 0.100(7) 0.085(7) -0.043(6) -0.022(4) 0.021(4) 
C9 0.040(4) 0.074(6) 0.078(6) -0.033(5) 0.009(4) -0.015(4) 
C10 0.054(4) 0.046(4) 0.052(4) -0.017(3) 0.006(4) -0.004(3) 
C21 0.058(4) 0.039(4) 0.038(4) -0.005(3) -0.004(3) 0.002(3) 
C20 0.093(6) 0.038(4) 0.052(5) -0.017(3) -0.004(4) -0.002(4) 
C19 0.068(5) 0.041(4) 0.056(4) -0.012(3) -0.010(4) -0.006(3) 
C18 0.049(4) 0.041(4) 0.040(4) -0.004(3) -0.018(3) -0.003(3) 
C17 0.053(4) 0.048(4) 0.050(4) -0.002(3) -0.015(4) -0.014(3) 
C16 0.032(3) 0.069(5) 0.048(4) -0.002(4) -0.008(3) -0.002(3) 
C15 0.038(3) 0.056(4) 0.037(4) -0.004(3) -0.004(3) 0.007(3) 
C14 0.048(4) 0.032(3) 0.033(3) -0.003(3) -0.012(3) 0.003(3) 
C23 0.044(3) 0.035(3) 0.029(3) -0.001(3) -0.015(3) 0.005(3) 
C22 0.051(4) 0.029(3) 0.030(3) -0.001(2) -0.012(3) -0.004(3) 
 
_geom_special_details 
; 
 All esds (except the esd in the dihedral angle between two l.s. planes) 
 are estimated using the full covariance matrix.  The cell esds are taken 
 into account individually in the estimation of esds in distances, angles 
 and torsion angles; correlations between esds in cell parameters are only 
 used when they are defined by crystal symmetry.  An approximate (isotropic) 
 treatment of cell esds is used for estimating esds involving l.s. planes. 
; 
 
loop_ 
 _geom_bond_atom_site_label_1 
 _geom_bond_atom_site_label_2 
 _geom_bond_distance 
 _geom_bond_site_symmetry_2 
 _geom_bond_publ_flag 
Pd Se4 2.4107(7) . ? 
Pd Se3 2.4107(8) . ? 
Pd Se1 2.4334(8) . ? 
Pd Se2 2.4437(8) . ? 
Se2 C6 1.892(7) . ? 
Se2 C11 1.972(8) . ? 
Se4 C22 1.924(6) . ? 
Se4 C24 1.947(6) . ? 
Se1 C1 1.905(7) . ? 
Se1 C26 1.965(8) . ? 
Se3 C14 1.942(6) . ? 
Se3 C13 1.969(7) . ? 
Fe C1 2.003(7) . ? 
Fe C7 2.018(8) . ? 
Fe C6 2.020(7) . ? 
Fe C5 2.020(7) . ? 
Fe C2 2.023(8) . ? 
Fe C9 2.027(7) . ? 
Fe C10 2.032(8) . ? 
Fe C8 2.032(7) . ? 
Fe C3 2.033(8) . ? 
Fe C4 2.056(8) . ? 
P1 F2 1.549(6) . ? 
P1 F4 1.558(6) . ? 
P1 F3 1.558(6) . ? 
P1 F1 1.571(5) . ? 
P1 F5 1.579(6) . ? 
P1 F6 1.583(6) . ? 
P2 F9 1.537(8) . ? 
P2 F7 1.539(7) . ? 
P2 F12 1.543(8) . ? 
P2 F11 1.545(7) . ? 
P2 F10 1.566(7) . ? 
P2 F8 1.574(8) . ? 
C24 C25 1.512(10) . ? 
C24 H24A 0.9700 . ? 
C24 H24B 0.9700 . ? 
C25 C26 1.498(10) . ? 
C25 H25A 0.9700 . ? 
C25 H25B 0.9700 . ? 
C26 H26A 0.9700 . ? 
C26 H26B 0.9700 . ? 
C13 C12 1.484(11) . ? 
C13 H13A 0.9700 . ? 
C13 H13B 0.9700 . ? 
C11 C12 1.541(11) . ? 
C11 H11A 0.9700 . ? 
C11 H11B 0.9700 . ? 
C12 H12A 0.9700 . ? 
C12 H12B 0.9700 . ? 
C1 C2 1.404(10) . ? 
C1 C5 1.441(10) . ? 
C2 C3 1.373(12) . ? 
C2 H2 0.9800 . ? 
C3 C4 1.457(14) . ? 
C3 H3 0.9800 . ? 
C4 C5 1.384(10) . ? 
C4 H4 0.9800 . ? 
C5 H5 0.9800 . ? 
C6 C7 1.426(10) . ? 
C6 C10 1.432(10) . ? 
C7 C8 1.390(11) . ? 
C7 H7 0.9800 . ? 
C8 C9 1.396(13) . ? 
C8 H8 0.9800 . ? 
C9 C10 1.407(11) . ? 
C9 H9 0.9800 . ? 
C10 H10 0.9800 . ? 
C21 C22 1.365(9) . ? 
C21 C20 1.397(10) . ? 
C21 H21 0.9300 . ? 
C20 C19 1.354(11) . ? 
C20 H20 0.9300 . ? 
C19 C18 1.391(10) . ? 
C19 H19 0.9300 . ? 
C18 C17 1.428(10) . ? 
C18 C23 1.430(9) . ? 
C17 C16 1.323(11) . ? 
C17 H17 0.9300 . ? 
C16 C15 1.393(10) . ? 
C16 H16 0.9300 . ? 
C15 C14 1.393(9) . ? 
C15 H15 0.9300 . ? 
C14 C23 1.415(9) . ? 
C23 C22 1.440(9) . ? 
 
loop_ 
 _geom_angle_atom_site_label_1 
 _geom_angle_atom_site_label_2 
 _geom_angle_atom_site_label_3 
 _geom_angle 
 _geom_angle_site_symmetry_1 
 _geom_angle_site_symmetry_3 
 _geom_angle_publ_flag 
Se4 Pd Se3 76.19(3) . . ? 
Se4 Pd Se1 99.17(3) . . ? 
Se3 Pd Se1 175.03(3) . . ? 
Se4 Pd Se2 175.93(3) . . ? 
Se3 Pd Se2 99.89(3) . . ? 
Se1 Pd Se2 84.79(3) . . ? 
C6 Se2 C11 98.5(3) . . ? 
C6 Se2 Pd 100.2(2) . . ? 
C11 Se2 Pd 112.9(2) . . ? 
C22 Se4 C24 104.3(3) . . ? 
C22 Se4 Pd 95.98(18) . . ? 
C24 Se4 Pd 113.4(2) . . ? 
C1 Se1 C26 100.3(3) . . ? 
C1 Se1 Pd 101.0(2) . . ? 
C26 Se1 Pd 112.1(2) . . ? 
C14 Se3 C13 104.0(3) . . ? 
C14 Se3 Pd 98.13(19) . . ? 
C13 Se3 Pd 111.9(2) . . ? 
C1 Fe C7 125.9(3) . . ? 
C1 Fe C6 111.7(3) . . ? 
C7 Fe C6 41.4(3) . . ? 
C1 Fe C5 42.0(3) . . ? 
C7 Fe C5 162.1(3) . . ? 
C6 Fe C5 124.0(3) . . ? 
C1 Fe C2 40.8(3) . . ? 
C7 Fe C2 109.7(4) . . ? 
C6 Fe C2 127.8(3) . . ? 
C5 Fe C2 69.7(3) . . ? 
C1 Fe C9 160.3(3) . . ? 
C7 Fe C9 68.1(4) . . ? 
C6 Fe C9 68.3(3) . . ? 
C5 Fe C9 120.5(4) . . ? 
C2 Fe C9 154.8(3) . . ? 
C1 Fe C10 126.1(3) . . ? 
C7 Fe C10 69.5(3) . . ? 
C6 Fe C10 41.4(3) . . ? 
C5 Fe C10 106.0(3) . . ? 
C2 Fe C10 164.3(3) . . ? 
C9 Fe C10 40.6(3) . . ? 
C1 Fe C8 159.3(4) . . ? 
C7 Fe C8 40.1(3) . . ? 
C6 Fe C8 68.3(3) . . ? 
C5 Fe C8 155.9(4) . . ? 
C2 Fe C8 121.7(4) . . ? 
C9 Fe C8 40.2(4) . . ? 
C10 Fe C8 68.5(4) . . ? 
C1 Fe C3 67.6(3) . . ? 
C7 Fe C3 123.0(4) . . ? 
C6 Fe C3 161.7(4) . . ? 
C5 Fe C3 68.6(4) . . ? 
C2 Fe C3 39.6(3) . . ? 
C9 Fe C3 119.0(4) . . ? 
C10 Fe C3 154.3(4) . . ? 
C8 Fe C3 105.6(4) . . ? 
C1 Fe C4 68.3(3) . . ? 
C7 Fe C4 157.9(3) . . ? 
C6 Fe C4 156.4(4) . . ? 
C5 Fe C4 39.7(3) . . ? 
C2 Fe C4 68.8(4) . . ? 
C9 Fe C4 103.5(4) . . ? 
C10 Fe C4 118.1(4) . . ? 
C8 Fe C4 120.5(3) . . ? 
C3 Fe C4 41.7(4) . . ? 
F2 P1 F4 88.1(4) . . ? 
F2 P1 F3 91.2(4) . . ? 
F4 P1 F3 89.5(4) . . ? 
F2 P1 F1 91.8(4) . . ? 
F4 P1 F1 179.2(4) . . ? 
F3 P1 F1 91.4(4) . . ? 
F2 P1 F5 177.3(4) . . ? 
F4 P1 F5 90.7(4) . . ? 
F3 P1 F5 91.2(4) . . ? 
F1 P1 F5 89.4(3) . . ? 
F2 P1 F6 89.2(4) . . ? 
F4 P1 F6 91.8(4) . . ? 
F3 P1 F6 178.7(4) . . ? 
F1 P1 F6 87.4(4) . . ? 
F5 P1 F6 88.4(4) . . ? 
F9 P2 F7 89.6(5) . . ? 
F9 P2 F12 175.3(6) . . ? 
F7 P2 F12 92.1(5) . . ? 
F9 P2 F11 95.6(6) . . ? 
F7 P2 F11 90.1(4) . . ? 
F12 P2 F11 88.8(6) . . ? 
F9 P2 F10 89.5(5) . . ? 
F7 P2 F10 179.0(5) . . ? 
F12 P2 F10 88.8(5) . . ? 
F11 P2 F10 90.4(5) . . ? 
F9 P2 F8 86.3(6) . . ? 
F7 P2 F8 87.6(5) . . ? 
F12 P2 F8 89.4(6) . . ? 
F11 P2 F8 177.0(6) . . ? 
F10 P2 F8 92.0(5) . . ? 
C25 C24 Se4 120.1(5) . . ? 
C25 C24 H24A 107.3 . . ? 
Se4 C24 H24A 107.3 . . ? 
C25 C24 H24B 107.3 . . ? 
Se4 C24 H24B 107.3 . . ? 
H24A C24 H24B 106.9 . . ? 
C26 C25 C24 114.0(6) . . ? 
C26 C25 H25A 108.7 . . ? 
C24 C25 H25A 108.7 . . ? 
C26 C25 H25B 108.7 . . ? 
C24 C25 H25B 108.7 . . ? 
H25A C25 H25B 107.6 . . ? 
C25 C26 Se1 117.2(5) . . ? 
C25 C26 H26A 108.0 . . ? 
Se1 C26 H26A 108.0 . . ? 
C25 C26 H26B 108.0 . . ? 
Se1 C26 H26B 108.0 . . ? 
H26A C26 H26B 107.2 . . ? 
C12 C13 Se3 117.5(5) . . ? 
C12 C13 H13A 107.9 . . ? 
Se3 C13 H13A 107.9 . . ? 
C12 C13 H13B 107.9 . . ? 
Se3 C13 H13B 107.9 . . ? 
H13A C13 H13B 107.2 . . ? 
C12 C11 Se2 117.0(5) . . ? 
C12 C11 H11A 108.0 . . ? 
Se2 C11 H11A 108.0 . . ? 
C12 C11 H11B 108.0 . . ? 
Se2 C11 H11B 108.0 . . ? 
H11A C11 H11B 107.3 . . ? 
C13 C12 C11 113.1(7) . . ? 
C13 C12 H12A 109.0 . . ? 
C11 C12 H12A 109.0 . . ? 
C13 C12 H12B 109.0 . . ? 
C11 C12 H12B 109.0 . . ? 
H12A C12 H12B 107.8 . . ? 
C2 C1 C5 108.5(6) . . ? 
C2 C1 Se1 124.3(6) . . ? 
C5 C1 Se1 127.0(5) . . ? 
C2 C1 Fe 70.4(4) . . ? 
C5 C1 Fe 69.6(4) . . ? 
Se1 C1 Fe 122.1(3) . . ? 
C3 C2 C1 107.9(8) . . ? 
C3 C2 Fe 70.6(5) . . ? 
C1 C2 Fe 68.8(4) . . ? 
C3 C2 H2 126.0 . . ? 
C1 C2 H2 126.0 . . ? 
Fe C2 H2 126.0 . . ? 
C2 C3 C4 109.0(7) . . ? 
C2 C3 Fe 69.8(5) . . ? 
C4 C3 Fe 69.9(5) . . ? 
C2 C3 H3 125.5 . . ? 
C4 C3 H3 125.5 . . ? 
Fe C3 H3 125.5 . . ? 
C5 C4 C3 107.1(7) . . ? 
C5 C4 Fe 68.8(4) . . ? 
C3 C4 Fe 68.3(5) . . ? 
C5 C4 H4 126.5 . . ? 
C3 C4 H4 126.5 . . ? 
Fe C4 H4 126.5 . . ? 
C4 C5 C1 107.5(7) . . ? 
C4 C5 Fe 71.5(5) . . ? 
C1 C5 Fe 68.4(4) . . ? 
C4 C5 H5 126.3 . . ? 
C1 C5 H5 126.3 . . ? 
Fe C5 H5 126.3 . . ? 
C7 C6 C10 107.8(6) . . ? 
C7 C6 Se2 123.7(6) . . ? 
C10 C6 Se2 128.5(6) . . ? 
C7 C6 Fe 69.2(4) . . ? 
C10 C6 Fe 69.7(4) . . ? 
Se2 C6 Fe 124.9(3) . . ? 
C8 C7 C6 107.8(8) . . ? 
C8 C7 Fe 70.5(5) . . ? 
C6 C7 Fe 69.4(4) . . ? 
C8 C7 H7 126.1 . . ? 
C6 C7 H7 126.1 . . ? 
Fe C7 H7 126.1 . . ? 
C7 C8 C9 108.7(8) . . ? 
C7 C8 Fe 69.4(4) . . ? 
C9 C8 Fe 69.7(4) . . ? 
C7 C8 H8 125.7 . . ? 
C9 C8 H8 125.7 . . ? 
Fe C8 H8 125.7 . . ? 
C8 C9 C10 109.4(7) . . ? 
C8 C9 Fe 70.1(5) . . ? 
C10 C9 Fe 69.9(4) . . ? 
C8 C9 H9 125.3 . . ? 
C10 C9 H9 125.3 . . ? 
Fe C9 H9 125.3 . . ? 
C9 C10 C6 106.3(7) . . ? 
C9 C10 Fe 69.5(5) . . ? 
C6 C10 Fe 68.9(4) . . ? 
C9 C10 H10 126.8 . . ? 
C6 C10 H10 126.8 . . ? 
Fe C10 H10 126.8 . . ? 
C22 C21 C20 122.3(7) . . ? 
C22 C21 H21 118.9 . . ? 
C20 C21 H21 118.9 . . ? 
C19 C20 C21 118.3(7) . . ? 
C19 C20 H20 120.8 . . ? 
C21 C20 H20 120.8 . . ? 
C20 C19 C18 122.1(7) . . ? 
C20 C19 H19 118.9 . . ? 
C18 C19 H19 118.9 . . ? 
C19 C18 C17 119.6(7) . . ? 
C19 C18 C23 120.9(7) . . ? 
C17 C18 C23 119.5(7) . . ? 
C16 C17 C18 122.0(7) . . ? 
C16 C17 H17 119.0 . . ? 
C18 C17 H17 119.0 . . ? 
C17 C16 C15 120.1(7) . . ? 
C17 C16 H16 119.9 . . ? 
C15 C16 H16 119.9 . . ? 
C14 C15 C16 120.5(7) . . ? 
C14 C15 H15 119.7 . . ? 
C16 C15 H15 119.7 . . ? 
C15 C14 C23 121.2(6) . . ? 
C15 C14 Se3 115.5(5) . . ? 
C23 C14 Se3 123.2(5) . . ? 
C14 C23 C18 116.6(6) . . ? 
C14 C23 C22 127.9(6) . . ? 
C18 C23 C22 115.5(6) . . ? 
C21 C22 C23 120.8(6) . . ? 
C21 C22 Se4 118.2(5) . . ? 
C23 C22 Se4 120.8(5) . . ? 
 
_diffrn_measured_fraction_theta_max    0.981 
_diffrn_reflns_theta_full              25.00 
_diffrn_measured_fraction_theta_full   0.981 
_refine_diff_density_max    2.008 
_refine_diff_density_min   -1.751 
_refine_diff_density_rms    0.190 
